# Supplementary material for: Characterizing Vericiguat Treatment in Heart Failure: A Multicenter Real-World Study in China
Source: PubMed Central journal article supplement (PMC11683721; doi:10.31083/j.rcm2512427), 2024-11-29
Supplement: 2153-8174-25-12-427-s1.pdf [file 2153-8174-25-12-427-s1.pdf]

# Baseline characteristics of heart failure patients with initiated vericiguat treatment: a multicenter real-world study in China

## Supplementary Material

**Table S1.** List of hospitals participating in this study

**Table S2.** Missing data

**Table S1.** List of hospitals participating in this study

| <b>Hospital Name</b>                                                         | <b>Department</b> | <b>City</b> |
|------------------------------------------------------------------------------|-------------------|-------------|
| The First Affiliated Hospital of USTC                                        | Cardiology        | Hefei       |
| Huaibei People's Hospital                                                    | Cardiology        | Huaibei     |
| The First People's Hospital of Anqing affiliated to Anhui Medical University | Cardiology        | Anqing      |
| The Third People's Hospital of Bengbu                                        | Cardiology        | Bengbu      |
| The First Affiliated Hospital of Wannan Medical College                      | Cardiology        | Wuhu        |
| People' s Hospital of Tongling                                               | Cardiology        | Tongling    |
| Anhui No.2 Provincial People's Hospital                                      | Cardiology        | Hefei       |
| Maanshan General Hospital of Ranger-Duree Healthcare                         | Cardiology        | Maanshan    |
| Anqing Municipal Hospital                                                    | Cardiology        | Anqing      |

**Table S2.** Missing data

| <b>Characteristics</b>                       | <b>Missing number</b> | <b>Missing rate (%)</b> |
|----------------------------------------------|-----------------------|-------------------------|
| Hospitalisation for heart failure            | 98                    | 34.4                    |
| Body mass index, kg/m <sup>2</sup>           | 97                    | 34.0                    |
| Heart failure duration, y                    | 99                    | 34.7                    |
| Left ventricular ejection fraction           | 14                    | 4.9                     |
| ACE inhibitor or ARB                         | 1                     | 0.35                    |
| Angiotensin receptor–neprilysin inhibitor    | 1                     | 0.35                    |
| Beta blocker                                 | 1                     | 0.35                    |
| MRA                                          | 2                     | 0.70                    |
| SGLT2 inhibitor                              | 1                     | 0.35                    |
| Hemoglobin, g/dL                             | 22                    | 7.7                     |
| Sodium, mEq/L                                | 27                    | 9.5                     |
| Potassium, mEq/L                             | 12                    | 4.2                     |
| Estimated GFR, mL/(min·1.73 m <sup>2</sup> ) | 44                    | 15.4                    |
| NT-proBNP, pg/mL                             | 12                    | 4.2                     |

ACE, angiotensin converting enzyme; ARB, angiotensin receptor blocker; GFR, glomerular filtration rate; MRA, mineralocorticoid receptor antagonist; NT-proBNP, N-terminal pro-B-type natriuretic peptide; SGLT2, Sodium glucose cotransporter 2.
